# Supplementary material for: Transcriptomic and targeted metabolome analyses revealed the regulatory mechanisms of the synthesis of bioactive compounds in Citrus grandis ‘tomentosa’
Source: PeerJ. 2024 Feb 23;12:e16881. doi: 10.7717/peerj.16881 (PMC10896087; doi:10.7717/peerj.16881)
Supplement: Supplemental Information 1 [file peerj-12-16881-s001.xlsx]

## Sheet: Table S1
Table S1 Flavonoid and coumarin contents of different tissues (petal, fruit, leaf) of Citrus grandis ‘tomentosa’
	Naringin (mg/g)	Rhoifolin (mg/g)	Naringenin (mg/g)	Apigenin (mg/g)	Coumarin (mg/g)
Petal1	67.61	2.22	0.32	0.67	0.11
Petal2	56.43	4.95	0.4	1.05	0.12
Petal3	66.13	3.61	0.3	0.54	0.13
Fruit1	430.26	2.49	2.2	0.52	0.36
Fruit2	406.61	5.76	2.49	0.38	0.48
Fruit3	418.09	7.78	3.5	0.32	0.42
Leave1	63.12	52.95	0.93	1.82	0.02
Leave2	59.39	62.48	1.03	2.98	0.02
Leave3	61.21	57.66	0.99	2.43	0.02

## Sheet: TableS2
Table S2. Volatile contents in different tissues of Citrus grandis ‘tomentosa’
Volatile compounds	P	F	L	Category
3-Thujene	0.1	1.05	1.45	Monoterpene
α-Pinene	0.08	1.25	2.02	Monoterpene
Sabinene	-	1.29	-	Monoterpene
β-Pinene	7.53	2.44	7.65	Monoterpene
β-Myrcene	15.32	27.67	11.25	Monoterpene
D-Limonene	1.53	4.01	6.43	Monoterpene
β-Ocimene	0.47	0.07	2.56	Monoterpene
γ--Terpinene	8.23	18.95	8.57	Monoterpene
α-Terpinene	-	0.54	1.68	Monoterpene
β-Terpinol	-	0.48	1.12	Monoterpene
cis-4-Thujanol	-	1.49	1.35	Monoterpene
β--Linalool	2.56	-	1.25	Monoterpene
α-Terpinol	1.59	2.45	2.35	Monoterpene
8-Hydroxylinalool	2.27	-	-	Monoterpene
Ficusin	-	-	8.56	Monoterpene
Elixene	0.27	0.87	3.24	sesquiterpenoids
β-Elemene	0.11	0.5	2.56	sesquiterpenoids
Santalene	0.08	-	0.85	sesquiterpenoids
Caryophyllene	2.25	3.25	1.35	sesquiterpenoids
β-Cubebene	0.1	0.93	0.35	sesquiterpenoids
γ-Muurolene	-	0.43	0.32	sesquiterpenoids
Bisabolene	0.28	0.65	2.58	sesquiterpenoids
Cadinene	-	0.07	1.54	sesquiterpenoids
D Germacrene	1.85	17.95	1.05	sesquiterpenoids
B Germacrene	0.33	1.77	0.32	sesquiterpenoids
α-Farnesene	0.04	-	2.42	sesquiterpenoids
δ-Cadinene	0.24	1.37	-	sesquiterpenoids
Nerolidol	20.57	0.15	0.38	sesquiterpenoids
Nerolidyl acetate	2.83	2.04	1.38	sesquiterpenoids
(-)-Spathulenol	0.29	-	0.43	sesquiterpenoids
Farnesol	14.85	-	-	sesquiterpenoids
Supraene	3.12	0.73	9.25	Triterpene
Dihydrobenzofuran	0.68	-	-	Coumarins
Herniarin	-	-	0.42	Coumarins
Bergapten	0.2	0.28	1.72	Coumarins
Ammidin	-	1.24	0.58	Coumarins
Aurapten	0.9	0.21	2.06	Coumarins
Myristaldehyde	1.25	-	-	Fatty acids
Linolic acid	3.89	2.15	5.18	Fatty acids
Methyl hexadecatrienoate	-	1.56	-	Fatty acids
Octadecanoic acid	0.82	0.21	0.69	Fatty acids
(9Z)-9,17-Octadecadienal	1.23	-	1.12	Fatty acids
9,12,15-Octadecatrienal	0.66	-	-	Fatty acids
Ethyl palmitate	2.65	0.38	2.56	Fatty acids
o-Cymol	0.14	0.82	0.42	Phenolic acids
2,6-Di-tert-butyl-4-methylphenol	0.12	0.25	-	Phenolic acids
2,4-Di-tert-butylphenol	0.23	0.19	0.17	Phenolic acids
Isolongifolol	-	-	0.68	Phenolic acids
Diisobutyl phthalate	0.34	0.31	0.14	Phenolic acids

## Sheet: Table S3
Table S3 Power calculations using functions in RNASeqPower
Group	Depth	log2FC	FDR	CV	power(n=3)
L-vs-F	10	2	0.05	0.023994	0.763279
P-vs-F	10	2	0.05	0.0235453	0.763366
L-vs-P	10	2	0.05	0.0174986	0.764386

## Sheet: TableS4
Table S4. Gene information and primer sequences used in RT-qPCR.
tracking_id	Annotation	Forward primer 5’-3’	Reverse primer 5’-3’
Cg1g023820	1-2Rhat1	GTATGGGCATGGTCGTTCCA	ACCACACTCATCTCTGCGTC
Cg8g018010	1-2Rhat2	ACAATCCATGAGCCAAAATCTTCA	GATCAGATGGCGGGGAATGT
Cg4g022000	4CL1	GCTAAGCTCCCTCATGCCAA	ATGCCGGTATCAGGATCGAC
Cg5g029290	4CL2F	TCTGTGCTCGTTGAGAGCTG	TCATAATCCGCCACCATCGG
Cg7g016010	AP1F	CTGCAGAAAGACCAAAGGCAC	TGCAGCCTTCTCTCTCTCCT
Cg1g005630	AP2F	CAAGCTCTTCAGCCGTGGTA	TTCACTCGATGTGGCTTGCT
Cg7g005600	CHI1F	AGAACGTCACTTTCACGCCG	GATTCCGTCAACTCCCCCG
Cg1g002060	F3HF	GCACCAGAGGCAACAGTGTA	GCTTTCTCGGAATCTTGGTGC
Cg2g036140	MYB24F	CCCCTCTGCCAAGCACAATA	TGCCATACGCATGTGGACTT
Cg5g013190	MYB86F	CTGCAGCTGCTTCTAACAACG	GTGGAATTCGGATTGAAGCAA
Cg7g006780	PAL1F	ACCGATCCTCTTCAAAAGCCA	CCCCTGGAAATTGCCTCCAT
Cg8g020000	PAL2F	GTCACGACTGGTTTTGGTGC	GCATTGCAGCTCTTGTTGCT
Cg7g004230	ActinF	TAGGAGGCTCCATCTTGGCT	CCGGACTCGTCATACTCAGC

## Sheet: TableS5
Table S5. Quantitative reverse transcription PCR validation of twelve genes in different tissues of Citrus grandis ‘tomentosa’
ID	F1 FPKM	F2 FPKM	F3 FPKM	L1 FPKM	L2 FPKM	L3 FPKM	P1 FPKM	P2 FPKM	P3 FPKM	F1 qPCR	F2 qPCR	F3 qPCR	L2 qPCR	L3 qPCR	L4 qPCR	P3 qPCR	P4 qPCR	P5 qPCR
Cg1g023820	242.5	124.9	225.55	24.84	44.32	76.74	27.86	16.69	14.21	1	1	1	0.23	0.19	0.24	0.12	0.14	0.1
Cg8g018010	1.3	2.76	3.19	0	0	0	8.85	6.77	11.31	1	1	1	0.01	0.01	0.02	4.23	4.18	4.25
Cg4g022000	53.96	53.91	39.05	40.89	23.14	26.84	516.82	615.11	648.73	1	1	1	1.13	1.06	1.14	18.22	18.25	18.16
Cg5g029290	48.84	43.9	54.2	7.52	9.95	7.81	28.05	25.14	21.73	1	1	1	0.19	0.15	0.2	0.52	0.41	0.63
Cg7g016010	2.43	1.45	2.34	10.36	9.5	6.39	0.41	0.37	0.54	1	1	1	6.2	6.18	6.25	0.14	0.16	0.13
Cg1g005630	72.66	71.27	77.96	10.2	11.03	11.49	62.47	62.23	66.41	1	1	1	0.18	0.18	0.21	0.82	0.74	0.89
Cg7g005600	22.58	14.27	16.27	3.15	2.24	3.64	5.63	4.37	4.16	1	1	1	0.53	0.54	0.49	0.39	0.45	0.36
Cg1g002060	98.25	123.72	124.32	9.07	12.17	11.14	100.58	92.53	76.01	1	1	1	0.22	0.2	0.21	1.01	0.87	1.06
Cg2g036140	1.67	8.26	6.26	0	0.05	0.08	0.09	0.24	0.24	1	1	1	0.01	0.02	0.02	0.11	0.14	0.08
Cg5g013190	1.63	1.81	3.03	13.8	12.68	9.84	1.55	1.48	4.44	1	1	1	3.22	3.25	3.16	2.2	2.29	2.12
Cg7g006780	58.35	55.97	65.88	96.17	81.75	86.9	253.45	258.01	274.51	1	1	1	1.35	1.25	1.36	4.28	4.39	4.38
Cg8g020000	4.04	6.16	5.24	6.39	7.73	7.31	144.15	174.66	227.67	1	1	1	1.27	1.2	1.28	28.35	28.54	28.31

## Sheet: TableS6
Table S6 Pathway enrichments in all DEGs in different tissues (petal, fruit, leave) of of Citrus grandis ‘tomentosa’
KEGG_A_class	KEGG_B_class	Pathway	all (2566)	All (5863)	Pvalue	Qvalue	Pathway ID
Metabolism	Global and Overview	Biosynthesis of secondary metabolites	787	1361	8.99559e-33	1.18742e-30	ko01110
Metabolism	Global and Overview	Microbial metabolism in diverse environments	251	386	2.86105e-18	1.88829e-16	ko01120
Metabolism	Global and Overview	Carbon metabolism	182	265	5.03616e-17	2.21591e-15	ko01200
Metabolism	Global and Overview	Biosynthesis of antibiotics	304	522	2.49438e-12	8.23144e-11	ko01130
Metabolism	Global and Overview	Metabolic pathways	1228	2519	1.49343e-11	3.94265e-10	ko01100
Metabolism	Carbohydrate metabolism	Glycolysis / Gluconeogenesis	86	116	2.01407e-11	4.43095e-10	ko00010
Environmental Information Processing	Signal transduction	Plant hormone signal transduction	165	266	6.84745e-10	1.29123e-08	ko04075
Metabolism	Carbohydrate metabolism	Citrate cycle (TCA cycle)	41	48	2.53002e-09	4.17454e-08	ko00020
Metabolism	Global and Overview	Biosynthesis of amino acids	146	234	3.89115e-09	5.70702e-08	ko01230
Metabolism	Energy metabolism	Carbon fixation in photosynthetic organisms	49	62	1.28603e-08	1.69756e-07	ko00710
Metabolism	Metabolism of terpenoids and polyketides	Limonene and pinene degradation	32	40	2.87634e-06	3.4516e-05	ko00903
Metabolism	Biosynthesis of other secondary metabolites	Stilbenoid, diarylheptanoid and gingerol biosynthesis	54	78	4.30109e-06	4.7312e-05	ko00945
Metabolism	Carbohydrate metabolism	Pyruvate metabolism	54	79	7.84543e-06	7.96613e-05	ko00620
Metabolism	Carbohydrate metabolism	Glyoxylate and dicarboxylate metabolism	48	69	1.19507e-05	0.000112678	ko00630
Metabolism	Biosynthesis of other secondary metabolites	Tropane, piperidine and pyridine alkaloid biosynthesis	30	40	5.74366e-05	0.000505442	ko00960
Metabolism	Energy metabolism	Photosynthesis - antenna proteins	16	18	9.39995e-05	0.000724139	ko00196
Metabolism	Lipid metabolism	alpha-Linolenic acid metabolism	46	69	9.63114e-05	0.000724139	ko00592
Metabolism	Amino acid metabolism	Arginine and proline metabolism	41	60	9.87462e-05	0.000724139	ko00330
Metabolism	Carbohydrate metabolism	Ascorbate and aldarate metabolism	29	40	0.000211816	0.00143015	ko00053
Metabolism	Amino acid metabolism	Glycine, serine and threonine metabolism	50	78	0.00021669	0.00143015	ko00260
Metabolism	Lipid metabolism	Linoleic acid metabolism	16	19	0.000352112	0.00221327	ko00591
Metabolism	Carbohydrate metabolism	Galactose metabolism	47	74	0.00045498	0.00272988	ko00052
Metabolism	Biosynthesis of other secondary metabolites	Phenylpropanoid biosynthesis	124	227	0.000517255	0.00296859	ko00940
Metabolism	Amino acid metabolism	Phenylalanine metabolism	38	58	0.000652855	0.0035907	ko00360
Metabolism	Carbohydrate metabolism	Fructose and mannose metabolism	44	70	0.000945763	0.00499363	ko00051
Metabolism	Biosynthesis of other secondary metabolites	Flavonoid biosynthesis	46	74	0.0010329	0.00524397	ko00941
Metabolism	Amino acid metabolism	Tryptophan metabolism	23	32	0.00118272	0.00557567	ko00380
Metabolism	Metabolism of terpenoids and polyketides	Diterpenoid biosynthesis	23	32	0.00118272	0.00557567	ko00904
Metabolism	Amino acid metabolism	Phenylalanine, tyrosine and tryptophan biosynthesis	36	56	0.00150975	0.00687197	ko00400
Metabolism	Metabolism of cofactors and vitamins	Thiamine metabolism	12	14	0.00158333	0.00696664	ko00730
Metabolism	Amino acid metabolism	Valine, leucine and isoleucine degradation	33	52	0.00320419	0.0136437	ko00280
Genetic Information Processing	Replication and repair	Base excision repair	34	54	0.00336984	0.0139006	ko03410
Metabolism	Metabolism of terpenoids and polyketides	Monoterpenoid biosynthesis	19	27	0.00468151	0.0187261	ko00902
Metabolism	Energy metabolism	Nitrogen metabolism	20	29	0.00535161	0.0207769	ko00910
Organismal Systems	Environmental adaptation	Plant-pathogen interaction	180	358	0.00619454	0.0228406	ko04626
Metabolism	Carbohydrate metabolism	Inositol phosphate metabolism	42	71	0.00622925	0.0228406	ko00562
Metabolism	Lipid metabolism	Biosynthesis of unsaturated fatty acids	23	35	0.00717947	0.0256132	ko01040
Metabolism	Carbohydrate metabolism	Pentose phosphate pathway	35	58	0.00786632	0.0273251	ko00030
Metabolism	Lipid metabolism	Fatty acid degradation	28	45	0.00948921	0.0321173	ko00071
Metabolism	Metabolism of other amino acids	beta-Alanine metabolism	29	47	0.00984207	0.0324788	ko00410
Metabolism	Metabolism of cofactors and vitamins	Porphyrin and chlorophyll metabolism	30	49	0.0101615	0.0327152	ko00860
Metabolism	Glycan biosynthesis and metabolism	Glycosaminoglycan degradation	12	16	0.0114465	0.0359748	ko00531
Metabolism	Metabolism of terpenoids and polyketides	Brassinosteroid biosynthesis	10	13	0.0161844	0.0496823	ko00905
Metabolism	Metabolism of terpenoids and polyketides	Carotenoid biosynthesis	27	45	0.0204258	0.0612773	ko00906
Metabolism	Metabolism of other amino acids	Cyanoamino acid metabolism	33	57	0.0217611	0.0627744	ko00460
Metabolism	Amino acid metabolism	Tyrosine metabolism	35	61	0.0218759	0.0627744	ko00350
Metabolism	Carbohydrate metabolism	Starch and sucrose metabolism	120	239	0.0239651	0.0673061	ko00500
Cellular Processes	Transport and catabolism	Peroxisome	52	96	0.0249801	0.0686953	ko04146
Metabolism	Global and Overview	Degradation of aromatic compounds	9	12	0.0291127	0.0768839	ko01220
Metabolism	Lipid metabolism	Glycerolipid metabolism	35	62	0.0294821	0.0768839	ko00561
Genetic Information Processing	Replication and repair	DNA replication	32	56	0.0297051	0.0768839	ko03030
Metabolism	Biosynthesis of other secondary metabolites	Flavone and flavonol biosynthesis	6	7	0.0306632	0.0778373	ko00944
Metabolism	Amino acid metabolism	Lysine degradation	21	35	0.0387998	0.0966334	ko00310
Metabolism	Lipid metabolism	Steroid biosynthesis	28	49	0.0405153	0.0990375	ko00100
Metabolism	Global and Overview	Fatty acid metabolism	43	80	0.0451657	0.108398	ko01212
Metabolism	Global and Overview	2-Oxocarboxylic acid metabolism	34	62	0.0512334	0.11996	ko01210
Metabolism	Metabolism of cofactors and vitamins	Biotin metabolism	16	26	0.0518007	0.11996	ko00780
Metabolism	Amino acid metabolism	Arginine biosynthesis	17	28	0.0530371	0.120705	ko00220
Metabolism	Carbohydrate metabolism	Propanoate metabolism	21	36	0.0555006	0.124171	ko00640
Metabolism	Carbohydrate metabolism	Amino sugar and nucleotide sugar metabolism	79	158	0.0646562	0.142244	ko00520
Metabolism	Biosynthesis of other secondary metabolites	Isoquinoline alkaloid biosynthesis	21	37	0.0766654	0.161894	ko00950
Metabolism	Lipid metabolism	Cutin, suberine and wax biosynthesis	17	29	0.0770724	0.161894	ko00073
Metabolism	Energy metabolism	Sulfur metabolism	18	31	0.0772676	0.161894	ko00920
Metabolism	Metabolism of other amino acids	Glutathione metabolism	59	117	0.0852585	0.175846	ko00480
Environmental Information Processing	Signal transduction	Phosphatidylinositol signaling system	31	58	0.0872582	0.177201	ko04070
Metabolism	Glycan biosynthesis and metabolism	Other glycan degradation	12	20	0.107889	0.21154	ko00511
Metabolism	Lipid metabolism	Ether lipid metabolism	13	22	0.108591	0.21154	ko00565
Genetic Information Processing	Replication and repair	Homologous recombination	31	59	0.108975	0.21154	ko03440
Metabolism	Metabolism of terpenoids and polyketides	Sesquiterpenoid and triterpenoid biosynthesis	26	49	0.120788	0.231073	ko00909
Organismal Systems	Environmental adaptation	Circadian rhythm - plant	25	47	0.123265	0.232443	ko04712
Metabolism	Glycan biosynthesis and metabolism	Glycosphingolipid biosynthesis - ganglio series	5	7	0.137233	0.251593	ko00604
Metabolism	Biosynthesis of other secondary metabolites	Anthocyanin biosynthesis	5	7	0.137233	0.251593	ko00942
Metabolism	Carbohydrate metabolism	Pentose and glucuronate interconversions	63	129	0.139229	0.251756	ko00040
Metabolism	Metabolism of other amino acids	Taurine and hypotaurine metabolism	6	9	0.147211	0.262593	ko00430
Metabolism	Glycan biosynthesis and metabolism	Other types of O-glycan biosynthesis	7	11	0.152728	0.268802	ko00514
Cellular Processes	Transport and catabolism	Regulation of autophagy	19	36	0.177351	0.30803	ko04140
Metabolism	Lipid metabolism	Synthesis and degradation of ketone bodies	4	6	0.235132	0.403083	ko00072
Metabolism	Lipid metabolism	Fatty acid biosynthesis	25	51	0.267359	0.452453	ko00061
Metabolism	Metabolism of cofactors and vitamins	Vitamin B6 metabolism	9	17	0.29998	0.501233	ko00750
Metabolism	Metabolism of cofactors and vitamins	Ubiquinone and other terpenoid-quinone biosynthesis	35	76	0.385088	0.635396	ko00130
Metabolism	Amino acid metabolism	Valine, leucine and isoleucine biosynthesis	11	23	0.42443	0.691665	ko00290
Metabolism	Biosynthesis of other secondary metabolites	Glucosinolate biosynthesis	6	12	0.438163	0.695274	ko00966
Genetic Information Processing	Replication and repair	Mismatch repair	18	39	0.441981	0.695274	ko03430
Metabolism	Glycan biosynthesis and metabolism	Glycosphingolipid biosynthesis - globo series	10	21	0.442447	0.695274	ko00603
Genetic Information Processing	Folding, sorting and degradation	Proteasome	21	47	0.5058	0.773401	ko03050
Metabolism	Lipid metabolism	Arachidonic acid metabolism	7	15	0.50899	0.773401	ko00590
Metabolism	Carbohydrate metabolism	Butanoate metabolism	10	22	0.518375	0.773401	ko00650
Metabolism	Metabolism of cofactors and vitamins	Folate biosynthesis	10	22	0.518375	0.773401	ko00790
Metabolism	Lipid metabolism	Glycerophospholipid metabolism	37	84	0.52146	0.773401	ko00564
Metabolism	Amino acid metabolism	Histidine metabolism	9	20	0.541575	0.79431	ko00340
Environmental Information Processing	Membrane transport	ABC transporters	17	39	0.570362	0.827338	ko02010
Genetic Information Processing	Translation	Ribosome biogenesis in eukaryotes	41	95	0.587265	0.835623	ko03008
Metabolism	Biosynthesis of other secondary metabolites	Acridone alkaloid biosynthesis	2	4	0.588735	0.835623	ko01058
Metabolism	Lipid metabolism	Fatty acid elongation	16	38	0.642234	0.892366	ko00062
Metabolism	Lipid metabolism	Sphingolipid metabolism	16	38	0.642234	0.892366	ko00600
Cellular Processes	Transport and catabolism	Phagosome	35	83	0.656425	0.902584	ko04145
Metabolism	Biosynthesis of other secondary metabolites	Caffeine metabolism	1	2	0.683816	0.924374	ko00232
Metabolism	Amino acid metabolism	Alanine, aspartate and glutamate metabolism	27	65	0.686277	0.924374	ko00250
Genetic Information Processing	Replication and repair	Non-homologous end-joining	4	10	0.707322	0.943095	ko03450
Metabolism	Metabolism of cofactors and vitamins	Lipoic acid metabolism	2	5	0.725038	0.95705	ko00785
Metabolism	Metabolism of terpenoids and polyketides	Terpenoid backbone biosynthesis	29	72	0.763333	0.996749	ko00900
Metabolism	Metabolism of other amino acids	Selenocompound metabolism	10	26	0.770215	0.996749	ko00450
Metabolism	Biosynthesis of other secondary metabolites	Monobactam biosynthesis	4	11	0.785667	1	ko00261
Metabolism	Energy metabolism	Oxidative phosphorylation	68	166	0.79288	1	ko00190
Metabolism	Carbohydrate metabolism	C5-Branched dibasic acid metabolism	4	12	0.84623	1	ko00660
Metabolism	Amino acid metabolism	Lysine biosynthesis	5	15	0.859553	1	ko00300
Metabolism	Glycan biosynthesis and metabolism	Glycosylphosphatidylinositol(GPI)-anchor biosynthesis	9	26	0.873745	1	ko00563
Metabolism	Metabolism of cofactors and vitamins	Nicotinate and nicotinamide metabolism	9	26	0.873745	1	ko00760
Metabolism	Amino acid metabolism	Cysteine and methionine metabolism	65	166	0.902567	1	ko00270
Genetic Information Processing	Replication and repair	Nucleotide excision repair	26	71	0.910981	1	ko03420
Genetic Information Processing	Folding, sorting and degradation	RNA degradation	56	145	0.911942	1	ko03018
Metabolism	Metabolism of cofactors and vitamins	Pantothenate and CoA biosynthesis	13	38	0.913659	1	ko00770
Metabolism	Metabolism of cofactors and vitamins	One carbon pool by folate	6	21	0.950936	1	ko00670
Metabolism	Glycan biosynthesis and metabolism	N-Glycan biosynthesis	13	42	0.96864	1	ko00510
Metabolism	Metabolism of cofactors and vitamins	Riboflavin metabolism	2	10	0.972325	1	ko00740
Genetic Information Processing	Folding, sorting and degradation	Sulfur relay system	4	17	0.976694	1	ko04122
Cellular Processes	Transport and catabolism	Endocytosis	57	158	0.9808	1	ko04144
Metabolism	Metabolism of terpenoids and polyketides	Zeatin biosynthesis	4	18	0.984553	1	ko00908
Genetic Information Processing	Transcription	Basal transcription factors	15	54	0.99494	1	ko03022
Genetic Information Processing	Translation	RNA transport	61	178	0.996499	1	ko03013
Genetic Information Processing	Folding, sorting and degradation	SNARE interactions in vesicular transport	10	41	0.997008	1	ko04130
Metabolism	Nucleotide metabolism	Pyrimidine metabolism	59	179	0.998941	1	ko00240
Metabolism	Nucleotide metabolism	Purine metabolism	83	242	0.999125	1	ko00230
Genetic Information Processing	Folding, sorting and degradation	Protein export	11	48	0.999256	1	ko03060
Metabolism	Energy metabolism	Photosynthesis	85	255	0.999799	1	ko00195
Genetic Information Processing	Translation	mRNA surveillance pathway	39	137	0.999933	1	ko03015
Genetic Information Processing	Folding, sorting and degradation	Ubiquitin mediated proteolysis	40	145	0.999984	1	ko04120
Genetic Information Processing	Translation	Aminoacyl-tRNA biosynthesis	14	68	0.999985	1	ko00970
Genetic Information Processing	Transcription	RNA polymerase	21	94	0.999996	1	ko03020
Genetic Information Processing	Translation	Ribosome	80	440	1	1	ko03010
Genetic Information Processing	Transcription	Spliceosome	43	215	1	1	ko03040
Genetic Information Processing	Folding, sorting and degradation	Protein processing in endoplasmic reticulum	79	278	1	1	ko04141

## Sheet: TableS7
Table S7 Expression of key genes of flavonoids and coumarin biosynthesis in different tissues (petal, fruit, leave) of Citrus grandis ‘tomentosa’
id	F1_fpkm	F2_fpkm	F3_fpkm	L1_fpkm	L2_fpkm	L3_fpkm	P1_fpkm	P2_fpkm	P3_fpkm	Description
Cg1g024060	332.49	209.1	233.82	107.31	112.83	111.59	177.99	158.01	159.25	cinnamate 4-hydroxylase [Citrus x paradisi]
Cg4g020580	5.94	2.61	3.92	0.48	0.22	0.52	0.12	0.39	0.31	cinnamate 4-hydroxylase CYP73 [Citrus sinensis]
Cg2g009540	1686.95	890.91	1329.29	26.86	78.85	77.99	2398.12	1951.01	1513.25	chalcone synthase [Citrus sinensis]
Cg3g016180	1.24	2.82	0.72	0.25	0.15	0	0.13	0	0	PREDICTED: chalcone synthase RJ5-like [Citrus sinensis]
Cg3g016190	38.94	29.52	23.52	65.31	60.24	47.78	0.59	0.74	0.9	PREDICTED: chalcone synthase-like [Citrus sinensis]
Cg9g011580	2.59	1.17	1.68	5.11	11.97	10.28	0.5	0.39	0.6	PREDICTED: chalcone synthase 1 isoform X1 [Citrus sinensis]
CgUng003760	0.35	0.53	0.48	0.34	0.41	0.64	4.09	3.38	6.02	PREDICTED: chalcone synthase 2-like [Citrus sinensis]
Cg7g005600	22.58	14.27	16.27	3.15	2.24	3.64	5.63	4.37	4.16	chalcone isomerase [Citrus maxima]
Cg3g008660	1.71	1.84	1.93	0.53	0.72	0.53	0.9	0.75	0.62	PREDICTED: 4-coumarate--CoA ligase-like 6 isoform X1 [Citrus sinensis]
Cg4g022000	53.96	53.91	39.05	40.89	23.14	26.84	516.82	615.11	648.73	PREDICTED: 4-coumarate--CoA ligase 2-like [Citrus sinensis]
Cg5g029290	48.84	43.9	54.2	7.52	9.95	7.81	28.05	25.14	21.73	PREDICTED: 4-coumarate--CoA ligase 2-like [Citrus sinensis]
Cg8g019500	2.14	2.67	2.45	9.3	9.69	9.94	9.95	9.74	7.48	PREDICTED: 4-coumarate--CoA ligase-like 7 [Citrus sinensis]
Cg8g019560	6.2	6.67	7.01	30.57	28.81	28.68	19.57	20.77	20.54	PREDICTED: 4-coumarate--CoA ligase-like 7 [Citrus sinensis]
Cg6g001740	13.68	10.39	15.7	13.38	24.53	24.7	7.94	6.98	5.92	PREDICTED: phenylalanine ammonia-lyase [Citrus sinensis]
Cg6g001770	129.8	110.23	152.27	41.4	76.67	70.67	49.85	36.27	38.43	PREDICTED: phenylalanine ammonia-lyase-like [Citrus sinensis]
Cg7g006780	58.35	55.97	65.88	96.17	81.75	86.9	253.45	258.01	274.51	phenylalanine ammonia-lyase [Citrus limon]
Cg8g019990	7.21	5.11	6.93	8.15	8.54	8.19	156.27	197.78	258.47	PREDICTED: phenylalanine ammonia-lyase-like [Citrus sinensis]
Cg8g020000	4.04	6.16	5.24	6.39	7.73	7.31	144.15	174.66	227.67	PREDICTED: phenylalanine ammonia-lyase-like [Citrus sinensis]
Cg1g023820	242.5	124.9	225.55	24.84	44.32	76.74	27.86	16.69	14.21	flavonoid 1-2 rhamnosyltransferase [Citrus maxima]
Cg8g018010	1.3	2.76	3.19	0	0	0	8.85	6.77	11.31	PREDICTED: flavanone 7-O-glucoside 2''-O-beta-L-rhamnosyltransferase-like [Citrus sinensis]
Cg5g006610	0	0	0	0.08	0	0.11	0.25	0.09	0.14	PREDICTED: beta-glucosidase 24-like [Citrus sinensis]
Cg7g023670	23.22	27.8	24.42	73.9	79.45	74.32	52.63	49.32	43.45	PREDICTED: beta-glucosidase 17-like isoform X2 [Citrus sinensis]
Cg7g023690	3.94	3.74	4.25	42.59	42.73	38.79	5.17	6.14	9.04	PREDICTED: beta-glucosidase 12-like [Citrus sinensis]
Cg7g023700	16.87	19.75	19.12	16.15	19.43	17.01	2.64	2.53	2.95	PREDICTED: beta-glucosidase 13-like [Citrus sinensis]
Cg8g002290	37.41	26.62	34.27	16.95	19.74	20.06	45.07	40.74	40.76	PREDICTED: beta-glucosidase 11-like isoform X2 [Citrus sinensis]
Cg8g002360	126.99	131.03	164.91	11.33	24.19	19.13	18.5	20.05	17.01	PREDICTED: beta-glucosidase 11-like isoform X2 [Citrus sinensis]
Cg5g014420	34.56	27.24	31.79	21.59	22.12	23.4	10.01	8.24	8.04	PREDICTED: beta-glucosidase BoGH3B-like [Citrus sinensis]
Cg5g014460	0.44	0	0	3.67	1.85	0.72	40.9	41.05	85	PREDICTED: beta-glucosidase BoGH3B-like [Citrus sinensis]
Cg5g014490	0.11	0.27	0.16	1.22	0.57	1.08	18.16	25.21	39.66	PREDICTED: beta-glucosidase BoGH3B-like [Citrus sinensis]
Cg5g031390	0.32	0.42	0.42	1.15	0.73	0.75	1.44	1.72	5.18	PREDICTED: beta-glucosidase BoGH3B-like [Citrus sinensis]
Cg8g011340	124.94	48.46	75.32	18.97	32.02	27.17	30.56	25.44	25.21	PREDICTED: beta-glucosidase BoGH3B-like [Citrus sinensis]
Cg2g021290	21.22	19.55	18.52	32.45	32.22	29.96	7.41	6.98	6.43	PREDICTED: beta-glucosidase 18-like isoform X1 [Citrus sinensis]
Cg2g040260	13.55	20.57	18.4	25.3	36.64	35.12	2.6	2.72	2.11	PREDICTED: beta-glucosidase 46-like [Citrus sinensis]
Cg2g040270	0.08	0.05	0.15	0.23	0.37	0.38	3.27	5.08	3.64	PREDICTED: beta-glucosidase 47-like [Citrus sinensis]
Cg6g018760	0	0	0.04	0	0	0	0.17	0.09	0.15	PREDICTED: beta-glucosidase 44-like [Citrus sinensis]

## Sheet: TableS8
Table S8 The expression of key genes of terpenoid biosynthesis in different tissues (petal, fruit, leave) of Citrus grandis ‘tomentosa’
id	F1_fpkm	F2_fpkm	F3_fpkm	L1_fpkm	L2_fpkm	L3_fpkm	P1_fpkm	P2_fpkm	P3_fpkm	Description
Cg3g025800	76.18	80.15	79.8	68.29	67.97	81.71	334.96	328.47	363.48	PREDICTED: 3-hydroxy-3-methylglutaryl-coenzyme A reductase 1 [Citrus sinensis]	Terpenoid backbone biosynthesis
Cg5g004930	120.75	113.58	124.42	63.98	73.71	74.82	157.36	166.86	154.24	PREDICTED: 1-deoxy-D-xylulose 5-phosphate reductoisomerase, chloroplastic [Citrus sinensis]
Cg2g020490	170.24	150.11	162.02	109.93	103.04	100.01	268.29	262.76	235.94	PREDICTED: acetyl-CoA acetyltransferase, cytosolic 1 [Citrus sinensis]
Cg2g030950	23.55	19.37	20.66	10.08	12.18	11.28	10.57	8.4	7.9	PREDICTED: mevalonate kinase isoform X1 [Citrus sinensis]
Cg2g005740	47.8	48.82	51.33	36.95	39.84	40.28	114.81	110.47	95.4	PREDICTED: 4-diphosphocytidyl-2-C-methyl-D-erythritol kinase, chloroplastic [Citrus sinensis]
Cg7g009470	41.87	36.72	44.39	16.8	21.87	18.48	85.93	77.37	77.67	PREDICTED: diphosphomevalonate decarboxylase-like [Citrus sinensis]
Cg5g009630	109.66	85.75	108.51	39.67	56.54	51.95	1162.82	1175.06	1086.89	PREDICTED: hydroxymethylglutaryl-CoA synthase [Citrus sinensis]
Cg9g026100	14.63	10.93	11.61	13.56	15.48	16.01	40.88	40.97	39.18	PREDICTED: hydroxymethylglutaryl-CoA synthase isoform X3 [Citrus sinensis]
Cg1g007720	143.73	170.66	191.68	208.35	308.97	400.69	1162.58	1433.45	1639.66	PREDICTED: probable 1-deoxy-D-xylulose-5-phosphate synthase 2, chloroplastic [Citrus sinensis]
Cg4g002880	9.4	10.79	9.73	8.57	9.8	9.36	3.87	4.73	4.14	PREDICTED: probable 1-deoxy-D-xylulose-5-phosphate synthase, chloroplastic isoform X2 [Citrus sinensis]
Cg4g022370	0	0	0	0.49	0.25	0.21	0	0	0	PREDICTED: probable 1-deoxy-D-xylulose-5-phosphate synthase 2, chloroplastic [Gossypium hirsutum]
Cg9g003730	29.66	39.77	33.47	122.16	125.01	106.32	5.81	6.11	6.13	PREDICTED: probable 1-deoxy-D-xylulose-5-phosphate synthase, chloroplastic [Citrus sinensis]
Cg8g020410	306.56	340.72	376.33	127.53	149.88	145.1	946.23	888.97	810.98	PREDICTED: 4-hydroxy-3-methylbut-2-en-1-yl diphosphate synthase (ferredoxin), chloroplastic [Citrus sinensis]
Cg8g006150	342.99	367.31	417.06	196.66	205.65	208.36	2646.5	2594.81	2432.24	PREDICTED: 4-hydroxy-3-methylbut-2-enyl diphosphate reductase, chloroplastic-like isoform X1 [Citrus sinensis]
Cg5g015770	9.2	6.35	6.81	4.78	4.26	6.01	13.81	16.82	14.87	PREDICTED: solanesyl diphosphate synthase 2, chloroplastic isoform X1 [Citrus sinensis]
Cg2g007860	10.01	10.5	11.53	2.98	3.11	3.08	12	11.57	9.32	PREDICTED: geranylgeranyl diphosphate reductase, chloroplastic-like [Jatropha curcas]
Cg5g034140	0	0	0	0.08	0	0.08	0.17	0.47	0.23	PREDICTED: dehydrodolichyl diphosphate synthase 6-like [Citrus sinensis]
Cg8g024010	0.64	0.67	0.23	0.95	0.19	0.8	0	0	0	PREDICTED: LOW QUALITY PROTEIN: dehydrodolichyl diphosphate synthase 2 [Citrus sinensis]
Cg1g003650	74.53	81.22	80.14	110.14	131.86	150.42	1034.76	1044.23	1017.09	GGPS [Citrus maxima]
Cg6g018360	0	0	0.05	0	0.07	0.06	0.72	0.65	0.26	PREDICTED: geranylgeranyl pyrophosphate synthase 7, chloroplastic-like [Citrus sinensis]
Cg6g018380	141.29	127.01	149.01	63.36	91.56	73.14	22.71	32.24	17.04	PREDICTED: geranylgeranyl pyrophosphate synthase 7, chloroplastic-like [Citrus sinensis]
Cg6g018390	8.38	5.41	8.66	4.49	5.91	4.22	4.35	3.31	3.46	PREDICTED: geranylgeranyl pyrophosphate synthase, chloroplastic-like [Citrus sinensis]
Cg8g001120	26.72	20.95	23.96	38.62	40.48	37.53	81.39	76.66	71.89	PREDICTED: heterodimeric geranylgeranyl pyrophosphate synthase small subunit, chloroplastic [Citrus sinensis]
Cg8g009770	0.17	0.75	0.17	0	0	0	0	0	0	PREDICTED: geranylgeranyl pyrophosphate synthase, chloroplastic-like [Citrus sinensis]
Cg9g016050	0	0.2	0.16	0	0.2	0.51	24.45	22.36	18.25	PREDICTED: heterodimeric geranylgeranyl pyrophosphate synthase small subunit, chloroplastic [Citrus sinensis]
Cg7g015120	36.98	35.02	38.08	30.25	31.15	33.56	10.73	10.16	9.61	PREDICTED: probable isoprenylcysteine alpha-carbonyl methylesterase ICMEL1 [Citrus sinensis]
Cg8g024490	11.49	9.18	10.31	22.06	23.96	23.8	13.14	13.39	13.81	NAD-dependent epimerase/dehydratase [Corchorus capsularis]
Cg2g017580	0.11	0.09	0	0	0	0	14	14.33	13.69	DUF829 domain-containing protein [Cephalotus follicularis]
Cg2g040850	15.59	11.51	17.09	1.19	2.42	3.43	756.5	1236.62	2011.19	PREDICTED: probable phytol kinase 3, chloroplastic [Citrus sinensis]
Cg2g040860	36.33	32.35	44.23	29.91	35.72	63.06	165.78	260.48	497.86	PREDICTED: probable terpene synthase 11 [Citrus sinensis]	Monoterpenoid biosynthesis
Cg2g040870	0	0	0	0	0	0	0.16	0.17	0.21	PREDICTED: (3S,6E)-nerolidol synthase 1-like [Citrus sinensis]
Cg2g040890	1.09	1.24	1.56	1.07	1.01	2.24	3.16	5.25	8.69	PREDICTED: (3S,6E)-nerolidol synthase 1 [Citrus sinensis]
Cg3g004050	44.83	57.94	73.36	0.3	0.95	0.63	10.76	12.53	7.39	PREDICTED: (R)-limonene synthase 1-like [Citrus sinensis]
Cg3g004080	43.86	24.06	36.02	2.73	8.15	5.64	1.52	1.73	0.32	PREDICTED: (3S,6E)-nerolidol synthase 1 [Citrus sinensis]
Cg3g004090	47.77	71.43	85.78	0	0	0.03	9.09	13.66	7.34	geraniol synthase [Citrus jambhiri]
Cg3g004130	30.9	15.1	21.37	2.05	7.43	4.23	0.19	0.29	0.22	geraniol synthase [Citrus jambhiri]
Cg3g004140	28.62	30.25	36.06	0.27	0.66	0.78	8.57	10.03	5.89	(+)-limonene synthase 1 [Citrus limon]
Cg5g027780	0.21	0.04	0.07	0	0	0	0	0	0.03	geraniol synthase [Citrus jambhiri]
Cg5g042420	44.91	42.67	53.23	12.63	20.89	15.67	3.34	4.54	3.68	d-limonene synthase [Citrus unshiu]
Cg5g042430	8.47	12.1	13.97	36.04	30.29	32.1	0.44	0.47	0.62	PREDICTED: (R)-limonene synthase 1-like [Citrus sinensis]
Cg5g042450	6.36	6.17	7.42	12.28	9.72	11.75	0.23	0.36	0.13	short-chain dehydrogenase/reductase family protein [Populus trichocarpa]
Cg5g042470	5.71	8.3	7.53	12.57	9.96	13.18	0.56	0.39	0.49	PREDICTED: (+)-neomenthol dehydrogenase-like [Citrus sinensis]
Cg9g015880	25.06	27.03	30.21	2.59	5.16	4.82	7.26	11.18	6.24	PREDICTED: (+)-neomenthol dehydrogenase-like [Citrus sinensis]
CgUng018780	1.66	4.58	2.45	0	0.07	0	0.15	0.28	0.41	PREDICTED: (+)-neomenthol dehydrogenase-like [Citrus sinensis]
CgUng019540	1.66	4.58	2.45	0	0.07	0	0.15	0.28	0.41	PREDICTED: (3S,6E)-nerolidol synthase 1-like isoform X1 [Citrus sinensis]
CgUng021700	23.63	5.24	16.12	2.08	4.92	3.95	0.25	0	0	geraniol synthase [Citrus jambhiri]
Cg1g006940	36.24	32.37	31.8	14.71	15.47	14.07	30.82	33.97	38.22	geraniol synthase [Citrus jambhiri]
Cg1g021690	0.93	1.34	0.18	2.59	2.68	2.79	0.6	1.3	0.35	geraniol synthase [Citrus jambhiri]
Cg1g021720	2.85	2.57	2.49	8.2	5.1	6.83	3.57	2.61	2.42	PREDICTED: squalene epoxidase 3 [Citrus sinensis]	Sesquiterpenoid and triterpenoid biosynthesis
Cg1g021730	0.14	0.11	0.61	1.66	1.3	1.4	0.78	0.79	0.64	PREDICTED: protein trichome birefringence [Citrus sinensis]
Cg1g021740	0.03	0.07	0.03	2.31	0.32	0.37	0.04	0.04	0	PREDICTED: beta-amyrin synthase-like isoform X1 [Citrus sinensis]
Cg1g021750	0.17	0.17	0.25	0.24	0.26	0.41	0.47	0.4	0.46	PREDICTED: beta-amyrin synthase-like isoform X1 [Citrus sinensis]
Cg1g021760	0.17	1.1	0.67	3.13	3.5	3.39	239.38	239.91	254.91	PREDICTED: beta-amyrin synthase-like isoform X1 [Citrus sinensis]
Cg1g022010	0.89	0.82	0.74	2.27	5.16	4.09	0.37	0.24	0.42	PREDICTED: beta-amyrin synthase-like isoform X2 [Citrus sinensis]
Cg2g001780	0	0	0	0	0	0	0.49	0.79	0.53	PREDICTED: beta-amyrin synthase-like [Citrus sinensis]
Cg2g012900	2.92	1.3	1.31	5.58	5.08	4.2	0.17	0.09	0.07	PREDICTED: beta-amyrin synthase-like [Citrus sinensis]
Cg2g022810	5.07	4.15	6.91	5.08	12.11	8.64	0.04	0.04	0.03	terpene synthase 12 [Tripterygium wilfordii]
Cg2g022860	4.11	11.87	11.62	7.66	7.96	6.83	0.47	0.62	1.18	PREDICTED: (-)-germacrene D synthase-like [Citrus sinensis]
Cg2g022870	10.17	6.57	7.94	7.36	6.62	5.17	0.18	0.07	0.06	terpene synthase, partial [Citrus limon]
Cg2g022910	0.3	0.04	0.35	23.53	25.42	20.64	0.18	0.15	0.28	PREDICTED: LOW QUALITY PROTEIN: alpha-copaene synthase-like [Citrus sinensis]
Cg2g022930	1.08	0.57	0.8	1.92	3.37	2.46	0	0	0	PREDICTED: (-)-germacrene D synthase-like isoform X1 [Citrus sinensis]
Cg2g022940	386.6	268.05	359.22	1.64	3.31	2.13	0.35	0.29	1.29	linalool synthase [Citrus unshiu]
Cg2g023030	71.1	73.38	82.58	0.67	5.79	2.94	0.29	0.55	0.95	PREDICTED: (-)-germacrene D synthase-like [Citrus sinensis]
Cg2g040820	20.25	19.42	16.17	36.67	26.31	35.03	34.47	39.49	50.19	PREDICTED: (-)-germacrene D synthase-like isoform X2 [Citrus sinensis]
Cg2g042270	0.18	0.11	0.13	0.13	0.11	0.04	0	0	0	delta-elemene synthase [Citrus jambhiri]
Cg3g013140	23.59	17.22	19.05	15.87	19.56	19.61	39.27	39.55	43.67	PREDICTED: alpha-farnesene synthase-like isoform X1 [Citrus sinensis]
Cg3g021540	14.94	15.97	16.54	20.97	19.07	18.52	7.98	8.32	7.94	PREDICTED: LOW QUALITY PROTEIN: squalene monooxygenase-like [Citrus sinensis]
Cg3g021550	9.78	10.12	10.7	22.88	22.08	22.47	10.51	10.93	12.23	PREDICTED: squalene epoxidase 1-like [Citrus sinensis]
Cg4g020440	0.29	0.34	0.34	0.07	0	0.07	0	0	0	NAD-dependent epimerase/dehydratase [Corchorus capsularis]
Cg5g026880	0.07	0.04	0.24	7.12	8.94	7.56	7.48	7.33	11.67	DUF829 domain-containing protein [Cephalotus follicularis]
Cg8g024860	0.78	1.67	1.53	1.61	1.89	1.69	0.27	0.52	0.27	PREDICTED: microtubule-associated protein TORTIFOLIA1 isoform X2 [Citrus sinensis]
Cg8g024870	0.06	0.04	0.09	0.32	0.28	0.45	0.41	0.42	0.54	PREDICTED: (-)-germacrene D synthase-like [Citrus sinensis]
Cg8g024860	0.353333	1.32667	1.73							PREDICTED: beta-amyrin synthase-like [Citrus sinensis]
Cg8g024870	0.456667	0.0633333	0.35							PREDICTED: beta-amyrin synthase-like [Citrus sinensis]
